# Supplementary material for: Multifunctional poly(vinylidene fluoride)/polyurethane/titanium dioxide nanofibrous membranes with enhanced ultraviolet-proof, resistant to blood penetration, and waterproof performance
Source: Royal Society of Chemistry journal article supplement (doi:10.1039/d3nj00877k), 2023-01-01
Supplement: d3nj00877k1.pdf [file d3nj00877k1.pdf]

## Supporting Information for

### **Multifunctional poly(vinylidene fluoride)/polyurethane/titanium dioxide nanofibrous membranes with enhanced ultraviolet-proof, resistant to blood penetration and waterproof performance**

Kefei Yu,<sup>a</sup> Yongbo Yao,<sup>a</sup> Kuihua Zhang,<sup>a</sup> Junlu Sheng,<sup>\*a</sup> Haiyan Liao,<sup>a</sup> Yunyun Zhai,<sup>b</sup> Xueqin Wang,<sup>\*c</sup> Zhe Li,<sup>a</sup> and Zhiyong Yan<sup>a</sup>

<sup>a</sup> College of Materials and Textile Engineering, Nanotechnology Research Institute, Jiaxing University, Jiaxing 314001, China. Email: shengjunlu@126.com

<sup>b</sup> Jiaxing Key Laboratory of Molecular Recognition and Sensing, College of Biological, Chemical Sciences and Engineering, Jiaxing University, Jiaxing 314001, China.

<sup>c</sup> College of Textiles and Clothing, Qingdao University, Shandong 266071, China. Email: xqwang1989@163.com

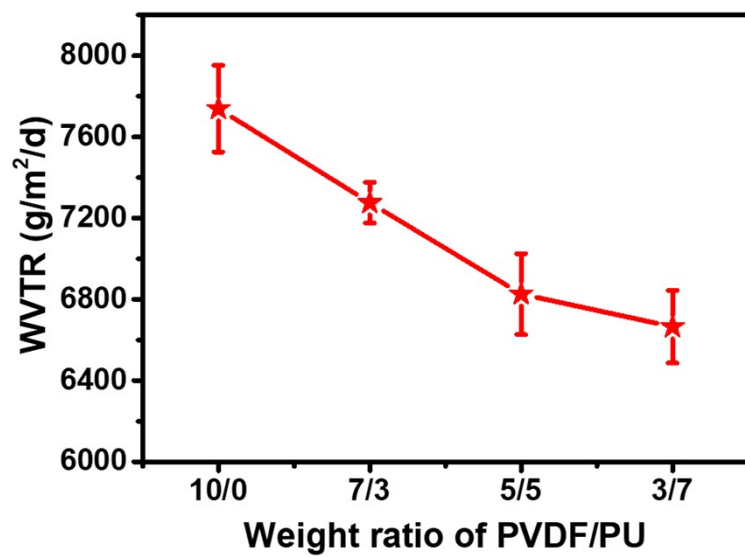

**Fig. S1** WVTR values of PVDF/PU nanofibrous membranes with different weight ratios.

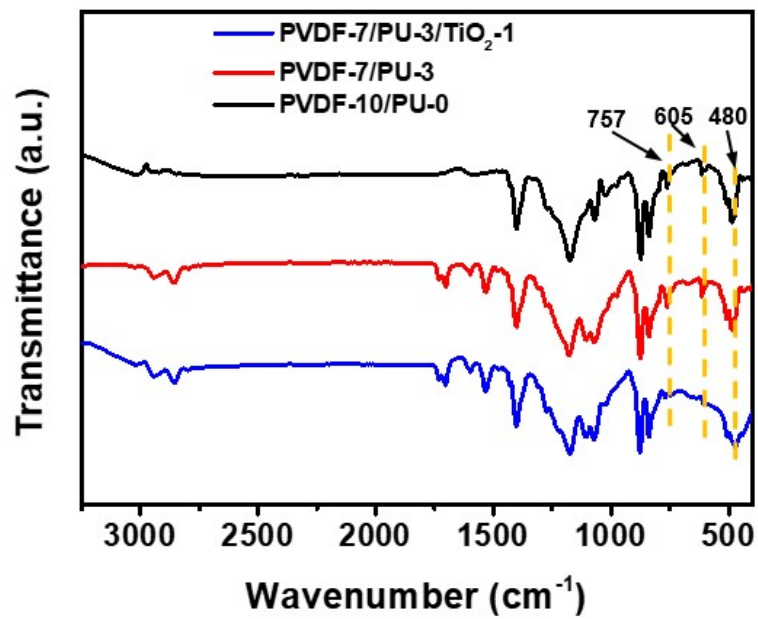

**Fig. S2** FT-IR spectra of PVDF-10/PU-0, PVDF-7/PU-3, and PVDF-7/PU-3/TiO<sub>2</sub>-1 nanofibrous membranes.

**Table S1** Tensile stress and breaking elongation data of PVDF/PU nanofibrous membranes and PVDF/PU/TiO<sub>2</sub> composite nanofibrous membranes.

| <b>Samples</b>                    | <b>Tensile stress (MPa)</b> | <b>Strain (%)</b> |
|-----------------------------------|-----------------------------|-------------------|
| PVDF-10/PU-0                      | 3.2                         | 123               |
| PVDF-7/PU-3                       | 4.8                         | 231               |
| PVDF-5/PU-5                       | 6.6                         | 259               |
| PVDF-3/PU-7                       | 9.9                         | 375               |
| PVDF-7/PU-3/TiO <sub>2</sub> -0.5 | 11.7                        | 227               |
| PVDF-7/PU-3/TiO <sub>2</sub> -1   | 9.2                         | 215               |
| PVDF-7/PU-3/TiO <sub>2</sub> -2   | 7.2                         | 212               |
| PVDF-7/PU-3/TiO <sub>2</sub> -4   | 7.0                         | 168               |

**Table S2** Ultraviolet protection factor (UPF), hydrostatic pressure and anti-synthetic blood penetration of PVDF/PU/TiO<sub>2</sub> composite nanofibrous membranes with different concentrations of TiO<sub>2</sub>.

| <b>Concentration of TiO<sub>2</sub><br/>(wt%)</b> | <b>UPF</b> | <b>Hydrostatic<br/>pressure (kPa)</b> | <b>Anti-synthetic blood<br/>penetration (kPa)</b> |
|---------------------------------------------------|------------|---------------------------------------|---------------------------------------------------|
| 0.5                                               | 510        | 26.8                                  | 1.75                                              |
| 1                                                 | 867        | 24.3                                  | 3.5                                               |
| 2                                                 | 1049       | 21.4                                  | 7                                                 |
| 4                                                 | 1351       | 20.9                                  | 7                                                 |

**Table S3** Comparison of tensile stress, hydrostatic pressure, WVTR, anti–synthetic blood penetration, and UPF between the PVDF-7/PU-3/TiO<sub>2</sub>-1 nanofibrous membranes and the electrospun waterproof and breathable membranes in other researches.

| <b>Other research</b>                                                            | <b>Tensile stress (MPa)</b> | <b>Hydrostatic pressure (kPa)</b> | <b>WVTR (g/m<sup>2</sup>/d)</b> | <b>Anti–synthetic blood penetration (kPa)</b> | <b>UPF</b> |
|----------------------------------------------------------------------------------|-----------------------------|-----------------------------------|---------------------------------|-----------------------------------------------|------------|
| PVDF-CNT/PU/PVDF-CNT sandwich-structured microporous membranes ( <b>Ref 21</b> ) | –                           | 38                                | 8630                            | –                                             | –          |
| PVDF/hydrogel Janus membranes ( <b>Ref 22</b> )                                  | –                           | 70                                | 13600                           | –                                             | –          |
| PVDF microporous membranes ( <b>Ref 23</b> )                                     | 1.42                        | 62                                | 10600                           | –                                             | –          |
| PU/photochromic microcapsule membranes ( <b>Ref 24</b> )                         | 12.08                       | 2.8                               | 19278                           | –                                             | –          |
| PVDF-7/PU-3/TiO <sub>2</sub> -1 nanofibrous membranes ( <b>this work</b> )       | 9.2                         | 24.3                              | 7023                            | 3.5                                           | 867        |
